# Supplementary material for: Prognostic model construction and immune microenvironment analysis of esophageal cancer based on gene expression data and microRNA target genes
Source: PubMed Central journal article supplement — Transl Cancer Res. 2023 Apr 13;12(5):1165–74. doi: 10.21037/tcr-22-2588 (PMC10248560; doi:10.21037/tcr-22-2588), 2023-04-13
Supplement: tcr-12-05-1165-supplementary.pdf [file tcr-12-05-1165-supplementary.pdf]

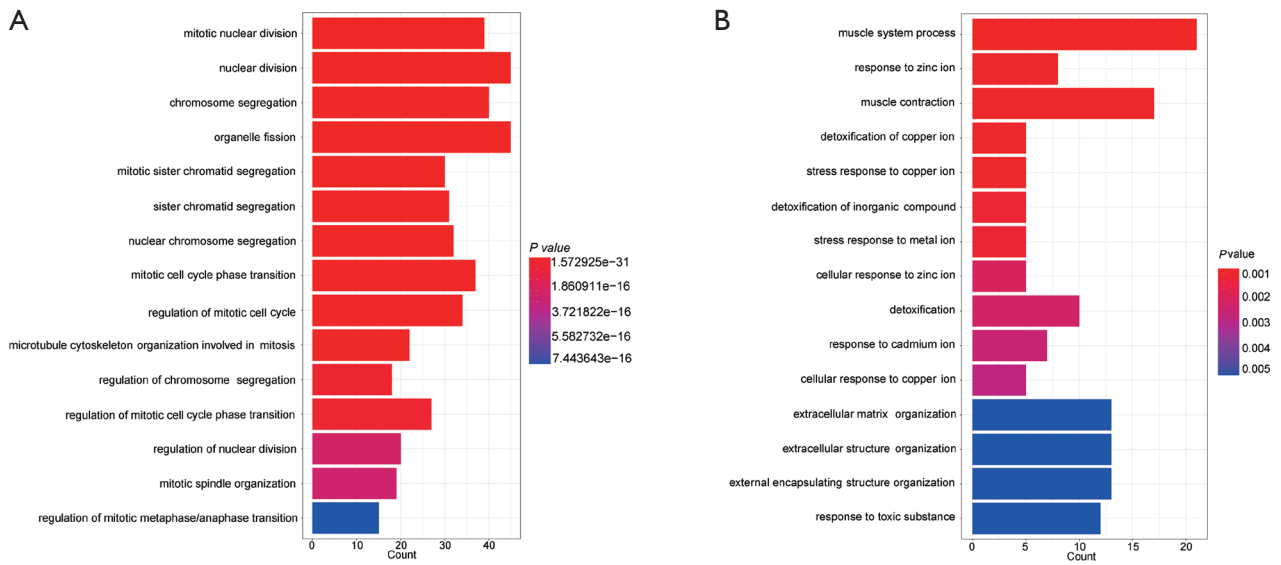

**Figure S1** Enrichment analysis of mRNA differentially genes. (A) mRNA differentially up-regulated genes. (B) mRNA differentially down-regulated genes.

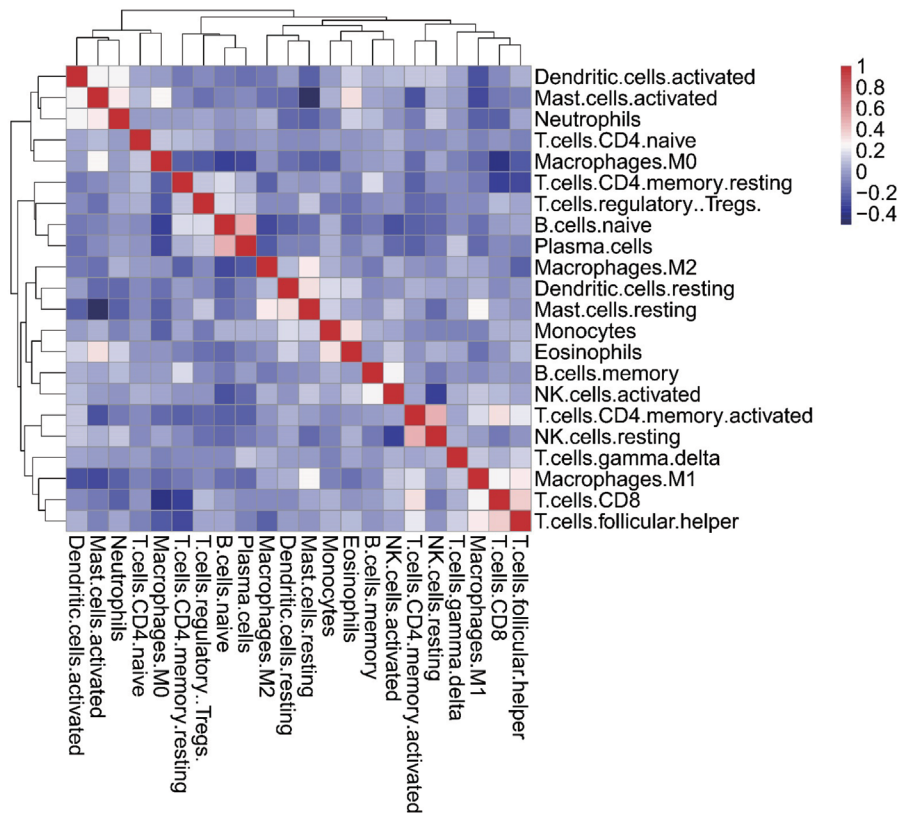

**Figure S2** The correlation between different immune cell infiltration rates. NK, natural killer.

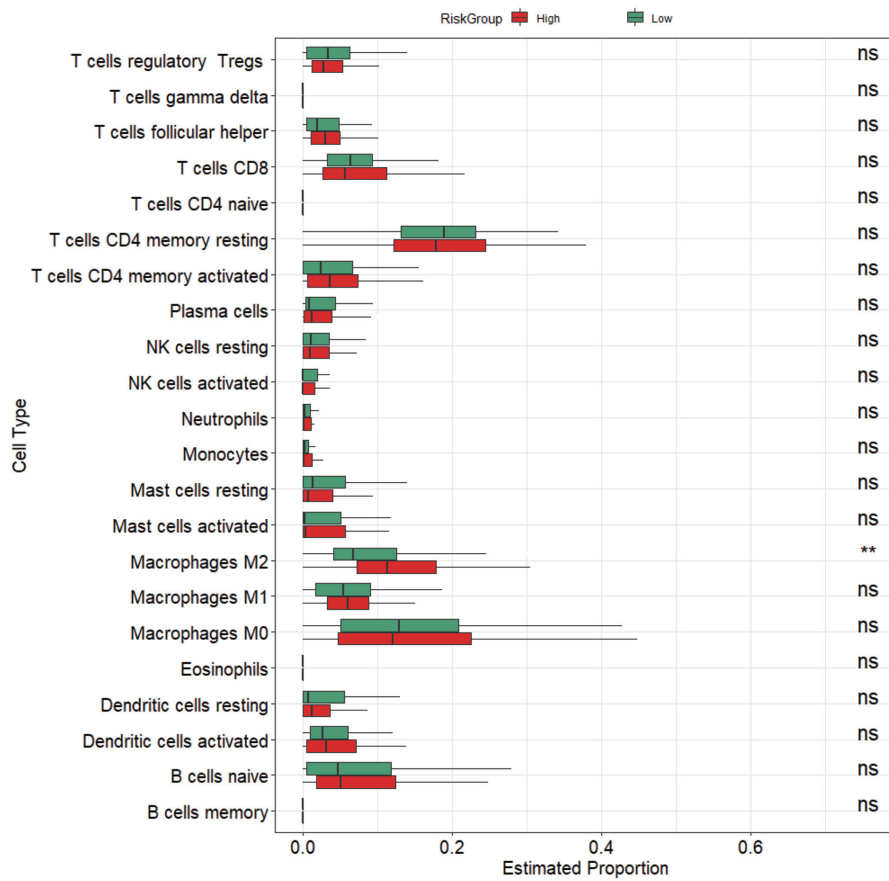

**Figure S3** The proportion of immune infiltrating cells in different subgroups: ns,  $P > 0.05$ ; \*\*,  $P \leq 0.001$ . NK, natural killer; ns, no significance.
